# Supplementary material
Source: PubMed Central journal article supplement (PMC2927855)
Supplement: NIHMS218458-supplement-supplement_1.pdf [file NIHMS218458-supplement-supplement_1.pdf]

**eTable 1. Rate ratios for the occurrence of falls<sup>a</sup> according to baseline pain measures, adjusted for history of falls.**

| Pain categories                                | N <sup>c</sup>            | No. falls | Model adjusted for history of falls <sup>b</sup> |            |
|------------------------------------------------|---------------------------|-----------|--------------------------------------------------|------------|
|                                                |                           |           | RR                                               | 95% CI     |
| <b>Chronic Musculoskeletal Pain</b>            |                           |           |                                                  |            |
| None                                           | 2671                      | 293       | 1.00                                             |            |
| Single site                                    | 81                        | 234       | 1.05                                             | 0.80, 1.38 |
| Polyarticular pain                             | 300                       | 502       | 1.30                                             | 1.01, 1.67 |
|                                                | No. in model <sup>c</sup> |           | N=705                                            |            |
| <b>BPI Pain Severity Score<sup>d</sup></b>     |                           |           |                                                  |            |
| Low severity tertile (0-0.99)                  | 237                       | 282       | 1.00                                             |            |
| Middle tertile (1.0-3.25)                      | 267                       | 378       | 1.06                                             | 0.82, 1.36 |
| High severity tertile (3.26-10)                | 242                       | 367       | 1.39                                             | 1.03, 1.87 |
|                                                | No. in model <sup>c</sup> |           | N=704                                            |            |
| <b>BPI Pain Interference Score<sup>d</sup></b> |                           |           |                                                  |            |
| Low interference tertile (0)                   | 284                       | 306       | 1.00                                             |            |
| Middle tertile (0.1-1.9)                       | 211                       | 327       | 1.23                                             | 0.96, 1.58 |
| High interference tertile (2-10)               | 251                       | 395       | 1.40                                             | 1.06, 1.85 |
|                                                | No. in model <sup>c</sup> |           | N=703                                            |            |

<sup>a</sup> Adjusted rate ratios and 95 % confidence intervals (C. I.) from negative binomial models predicting fall rate during up to 18 months of follow-up.

<sup>b</sup> Model covariates included age, sex, race, education, heart disease, diabetes, Parkinson's disease, history of stroke, vision score, BMI, cognitive function (MMSE), physical activity (PASE), balance score, repeated chair stand time, gait speed, and psychotherapeutic medications, daily use of analgesic and non-pain clinical criteria for hand and knee osteoarthritis, and history of one or more falls in the past year.

<sup>c</sup> Totals vary between pain measures and between models due to missing information about pain, fall history and other covariates.

<sup>d</sup> Pain severity and pain interferences subscales of the Brief Pain Inventory, each scored 0-10.
